# Prognostic Significance of Circulating Tumor Cells in Non-Small-Cell Lung Cancer Patients: A Meta-Analysis

Jianwei Huang<sup>1</sup>, Ke Wang<sup>1</sup>, Jianjun Xu<sup>2</sup>, Jian Huang<sup>1\*</sup>, Tao Zhang<sup>3\*</sup>

**1** Department of Oncology, Second Affiliated Hospital, Zhejiang University School of Medicine, Hangzhou, China, **2** School of Finance, Zhejiang University of Finance and Economics, Hangzhou, China, **3** Department of Preventive and Health Care, Second Affiliated Hospital, Zhejiang University School of Medicine, Hangzhou, China

## Abstract

**Background:** The prognostic significance of circulating tumor cells (CTCs) detected in patients with non-small-cell lung cancer (NSCLC) is still inconsistent. We aimed to assess the prognostic relevance of CTCs using a meta-analysis.

**Methods:** We searched PubMed, Web of Science and EMBASE for relevant studies that assessed the prognostic relevance of CTCs in NSCLC. Statistical analyses were conducted to calculate the summary incidence, odds ratio, relative risks (RRs) and 95% confidence intervals (CIs) using fixed or random-effects models according to the heterogeneity of included studies.

**Results:** A total of 20 studies, comprising 1576 patients, met the inclusion criteria. In identified studies, CTCs were not correlated with histology (adenocarcinoma vs squamous cell carcinoma) (odds ratio [OR] = 0.88; 95% confidence interval [CI]: 0.59–1.33;  $Z = -0.61$ ;  $P = 0.545$ ). However, pooled analyses showed that CTCs were associated with lymph node metastasis (OR = 2.06; 95% CI: 1.18–3.62;  $Z = 2.20$ ;  $P = 0.027$ ) and tumor stage (OR = 1.95; 95% CI: 1.08–3.54;  $Z = 2.53$ ;  $P = 0.011$ ). Moreover, CTCs were significantly associated with shorter overall survival (relative risk [RR] = 2.19; 95% CI: 1.53–3.12;  $Z = 4.32$ ;  $P < 0.0001$ ) and progression-free/disease-free survival (RR = 2.14; 95% CI: 1.36–3.38;  $Z = 3.28$ ;  $P < 0.0001$ ).

**Conclusion:** The presence of CTCs indicates a poor prognosis in patients with NSCLC. Further well-designed prospective studies are required to explore the clinical applications of CTCs in lung cancer.

**Citation:** Huang J, Wang K, Xu J, Huang J, Zhang T (2013) Prognostic Significance of Circulating Tumor Cells in Non-Small-Cell Lung Cancer Patients: A Meta-Analysis. PLoS ONE 8(11): e78070. doi:10.1371/journal.pone.0078070

**Editor:** Pierlorenzo Pallante, Institute of Experimental Endocrinology and Oncology 'G. Salvatore' (IEOS), Italy

**Received:** May 27, 2013; **Accepted:** September 16, 2013; **Published:** November 4, 2013

**Copyright:** © 2013 Huang et al. This is an open-access article distributed under the terms of the Creative Commons Attribution License, which permits unrestricted use, distribution, and reproduction in any medium, provided the original author and source are credited.

**Funding:** The authors have no support or funding to report.

**Competing Interests:** The authors have declared that no competing interests exist.

\* E-mail: drhuangjian@163.com (JH); jack\_zhangtao@163.com (TZ)

## Introduction

Primary lung cancer is the leading cause of cancer-related death worldwide, and non-small-cell lung cancer (NSCLC) accounts for 85% of those deaths [1]. The frequent occurrence of distant metastasis is the main cause of high mortality. Although histology and stage are currently used the prognostic factor in NSCLC patient follow-up, 25% to 50% of patients with early-stage NSCLC show tumor recurrence [2]. Moreover, even in patients without clinically detectable distant metastasis at the time of initial diagnosis, distant micrometastasis may frequently develop during diagnosis, even undergoing surgery. Therefore, sensitive prognostic and predictive markers is urgently needed in lung clinical oncology. In NSCLC patients, detecting circulating tumor cells (CTCs) may show clinical benefits in diagnosis and treatment.

CTCs are tumor cells that are shed from the primary tumor, flowing through the bloodstream and circulate throughout the body. The first report on metastatic tumor cells in drainage veins was by Ashworth in 1869 [3]. In the recent years, various new CTC assays are developed and employed for their detection, including immunocytochemistry (ICC), reverse-transcriptase polymerase chain reaction (RT-PCR), and the CellSearch System [4–6]. Among various detect methods, the CellSearch system is

introduced for clinical use by the U.S. FDA. This system uses immunomagnetic purification with antibodies against epithelial cell adhesion molecule (EpCAM) from peripheral blood. Regarding specificity of the CellSearch, it is the use of EpCAM expression as mechanism for detecting CTCs. Consequently, CTCs that low or absent expression EpCAM are easy missed. Several papers have demonstrated alternative detection technologies on the basis of EpCAM or other antigen with apparent greater sensitivity than CellSearch [7,8], and further studies for larger clinic are warranted.

Recently, a pooled analysis in breast and colorectal cancer has demonstrated the prognostic significance of CTCs, and changes in CTC number with standard therapy has highlighted the potential of CTCs [9,10]. However, in NSCLC patients, there still remains controversial regarding the incidence of CTCs and the clinical significance in NSCLC cancer. Some studies have reported that tumor cell detection in the blood is significantly associated with shorter survival [11,12]. In contrast, other studies have failed to show such an association between the presence of CTCs and a poorer prognosis [13]. Therefore, to address the prognostic value of CTCs in patients with NSCLC, we conducted a meta-analysis to determine the association of CTCs status with clinicopathological parameters, including histology, tumor stage, lymph node metastasis, and patients' survival.

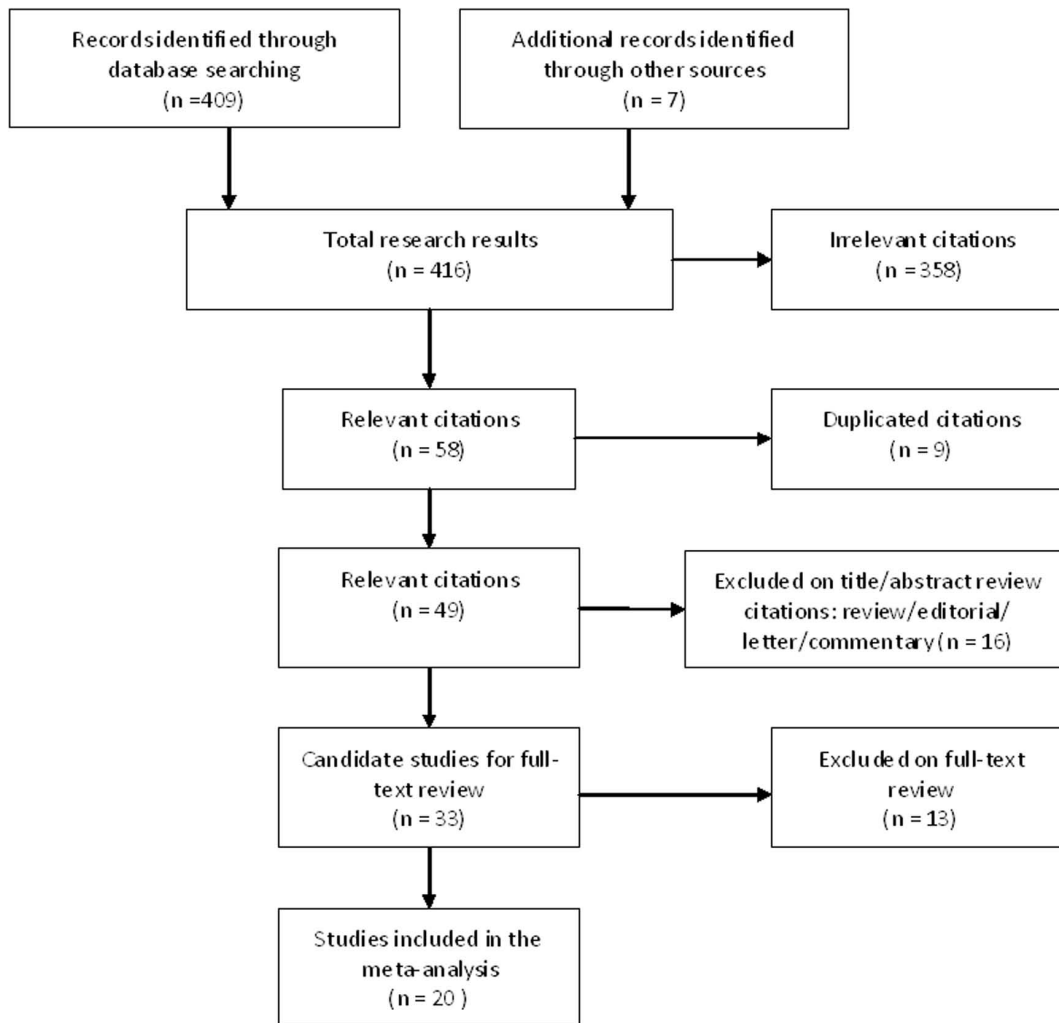

**Figure 1. Flow chart of selecting the eligible publications.**

doi:10.1371/journal.pone.0078070.g001

## Materials and Methods

### Publication search

We conducted an independent review of citations from PubMed (<http://www.ncbi.nlm.nih.gov/pubmed/>) between 1 January 2000, and 1 January 2013. Key words were circulating tumor cell(s), lung cancer, or lung neoplasm. The search strategy used text terms such as circulating cancer cells, CTCs, blood epithelial cell, and non-small cell lung cancer to identify relevant information as well. We also carried out independent searches using Web of Science and EMBASE databases, to ensure that no articles were overlooked. Furthermore, relevant articles were identified from cited references of retrieved articles and review articles by a manual search.

### Eligibility criteria

Studies were included in the meta-analysis according to the following: (1) when the presence of CTC status and either disease stage or survival (overall survival [OS] and/or progression-free survival [PFS]) data of NSCLC were investigated; (2) when investigators provided relevant information for estimating odds ratios (ORs) or relative risks (RRs); and (3) when the same authors reported a series of results in multiple publications, only the latest

was included in the analysis. Studies that did not report any clinical outcome were excluded. Studies with fewer than 20 analyzed patients, reviews, and comments were also excluded.

### Data extraction

We recorded the following information from each eligible paper: author's name, patient's country, publication year, number of patients, tumor stage, methods of CTC detection, detection rate, and cutoff value of CTCs. According to the study objective, we performed two types of analysis: the first analysis determined whether CTC status is correlated with clinicopathological parameters, which included histology (adenocarcinoma vs squamous cell carcinoma), lymph node metastasis, and cancer stage ( $T_1+T_2$  vs  $T_3+T_4$ ). The second analysis determined whether CTC status is associated with OS or PFS/disease-free survival (DFS).

### Statistical analysis

Survival data of each study were collected from original papers or calculated as described by Parmar et al [14]. The pooled ORs and RRs with 95% confidence intervals (CIs) for survival were calculated by fixed or random-effects models. Heterogeneity between studies was evaluated with the Cochran's  $Q$  test and  $P$  values. When  $P$  was less than 0.05, a random-effects estimate was

**Table 1.** Main characteristics of the eligible studies.

| Study     | Patient's country | Year | Tumor stage      | Technique  | Number of patients | Detection rate % | Target antigen /target gene           | Sampling time               | Cutoff of CTC+                  |
|-----------|-------------------|------|------------------|------------|--------------------|------------------|---------------------------------------|-----------------------------|---------------------------------|
| Yamashita | Japan             | 2002 | I-III            | RT-PCR     | 103                | 62(60%)          | CEA                                   | Pre-TM or Post-TM           | --                              |
| Sielen    | Germany           | 2003 | I-III            | other ICC  | 62                 | 11(18%)          | CK                                    | Pre-TM                      | 1 CTC/2.5 × 10 <sup>6</sup> MNC |
| Huang     | China             | 2004 | I-IV             | other ICC  | 58                 | 20(34.5%)        | --                                    | Pre-TM, Intro-TM or Post-TM | --                              |
| Sher      | China             | 2005 | I-IV             | RT-PCR     | 54                 | 39(72%)          | CK19, Trim28, Ubiquitin-thiolesterase | --                          | --                              |
| Rolle     | Germany           | 2005 | I-III            | other ICC  | 29                 | 25(85%)          | Human- epithelial antigen             | Pre-TM or Post-TM           | --                              |
| Sheu      | China             | 2006 | I-IV             | RT-PCR     | 100                | 90(90%)          | Multimarker assay                     | Pre-TM                      | --                              |
| Chen      | China             | 2007 | I-IIb            | RT-PCR     | 62                 | 44(66%)          | CK19                                  | Pre-TM or Post-TM           | --                              |
| Liu       | China             | 2008 | I-IV             | RT-PCR     | 134                | 84.3%            | TSA-9, KRT-19, Pre-proGRP             | --                          | --                              |
| Tanaka    | Japan             | 2009 | I-IV             | CellSearch | 125                | (30.6%)          | --                                    | Pre-TM or Intro-TM          | 1 CTCs/7.5 ml                   |
| Yie       | China             | 2009 | I-IV             | RT-PCR     | 143                | 63(44%)          | Survivin                              | Pre-TM                      | --                              |
| Hofman    | France            | 2010 | I-IV             | other ICC  | 208                | 102(49%)         | --                                    | Pre-TM                      | 50 CNHCs                        |
| Funaki    | Japan             | 2011 | I-IV             | other ICC  | 94                 | 68(72%)          | CK                                    | Post-TM                     | 1 CTC/1 × 10 <sup>6</sup>       |
| Krebs     | United Kingdom    | 2011 | III-IV           | CellSearch | 101                | 21(21%)          | --                                    | Pre-TM or Post-TM           | 2 CTCs/7.5 ml                   |
| Yoon      | Korea             | 2011 | I-III            | RT-PCR     | 79                 | 26(42.6%)        | TTF-1,CK19                            | Pre-TM or Post-TM           | --                              |
| Das       | America           | 2012 | IV               | other ICC  | 57                 | 24(42%)          | ERCC1                                 | Pre-TM or Post-TM           | 2 CTCs/1 × 10 <sup>6</sup>      |
| Punnoose  | Australia         | 2012 | IV               | CellSearch | 37                 | 28(78%)          | --                                    | Pre-TM or Post-TM           | 1 CTC/7.5 ml                    |
| Isobe     | Japan             | 2012 | IV or Recurrence | CellSearch | 24                 | 8(33.3%)         | --                                    | --                          | 1 CTCs/7.5 ml                   |
| Hirose    | Japan             | 2012 | IV               | CellSearch | 33                 | 12(36.3%)        | --                                    | Pre-TM or Post-TM           | 1 CTCs/7.5 ml                   |
| Franco    | Italy             | 2012 | I-IV             | other ICC  | 45                 | 11(24.4%)        | CK                                    | Post-TM                     | --                              |
| Nieva     | America           | 2012 | I-IV             | other ICC  | 28                 | 45(68%)          | CK                                    | Pre-TM or Post-TM           | 1 CTCs/ml                       |

Abbreviations ICC = Immunocytochemical, RT-PCR = Reverse transcriptase polymerase chain reaction, TM = Treatment  
doi:10.1371/journal.pone.0078070.t001

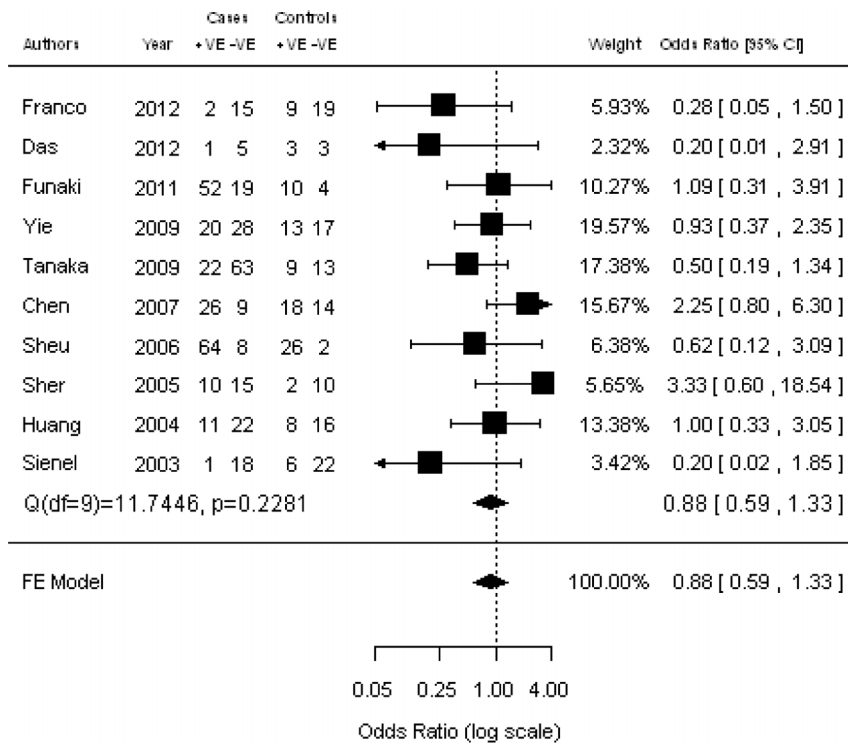

**Figure 2. Forrest plot of odds ratios (ORs) was evaluated for association between the presence of CTCs and histology.**  
doi:10.1371/journal.pone.0078070.g002

used. Otherwise, a fixed-effects model estimate was presented. Publication bias was assessed using the funnel plot and the Egger’s test, and the “trim-and-fill” method was to evaluate the effect of publication bias on the pooled effect. All statistical analyses were conducted using the software R/metafor version 2.14.0. *P* values less than 0.05 were considered statistically significant.

**Results**

**Description of studies**

The present work followed the guidelines for systematic reviews and meta-analyses (PRISMA) (Checklist S1). The

systematic literature search yielded a total of 416 records (Figure 1). After screening of titles, abstracts, and full text version, 396 articles were excluded because of irrelevant publications, review articles, duplicates, and overlapped studies. Finally, 20 publications met the criteria for analysis, comprising 1576 patients [2,11–13,15–30]. The sample size per study ranged from 24 to 208 patients, and studies were published between 2002 and 2012. The main characteristics of the included studies are summarized in Table 1. There were three types of methods for assessment of CTCs status in blood specimens: RT-PCR, ICC, and the CellSearch system. 8 studies used RT-PCR techniques to evaluate CTCs status, and 8 studies

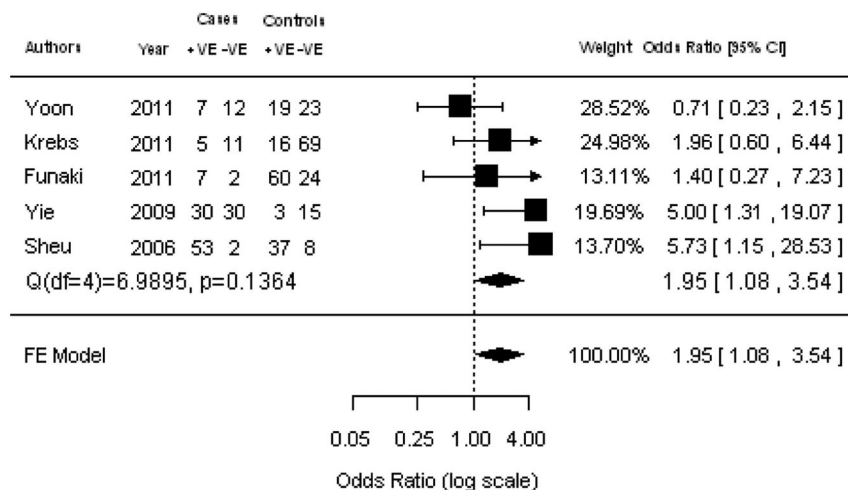

**Figure 3. Forrest plot of odds ratios (ORs) was evaluated for association between the presence of CTCs and lymph node metastasis.**  
doi:10.1371/journal.pone.0078070.g003

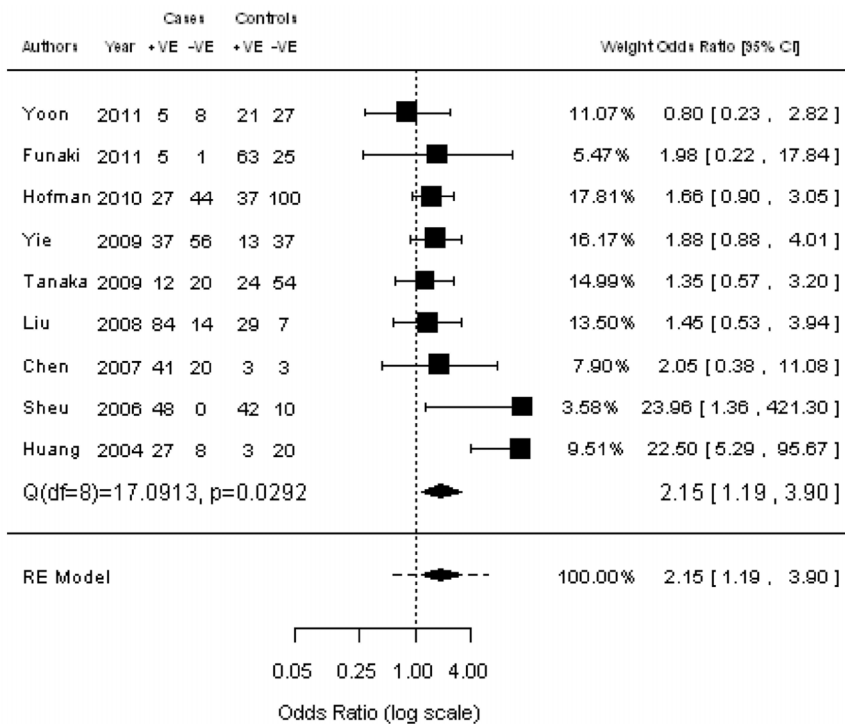

**Figure 4. Forrest plot of odds ratios (ORs) was evaluated for association between the presence of CTCs and tumor stage.**  
doi:10.1371/journal.pone.0078070.g004

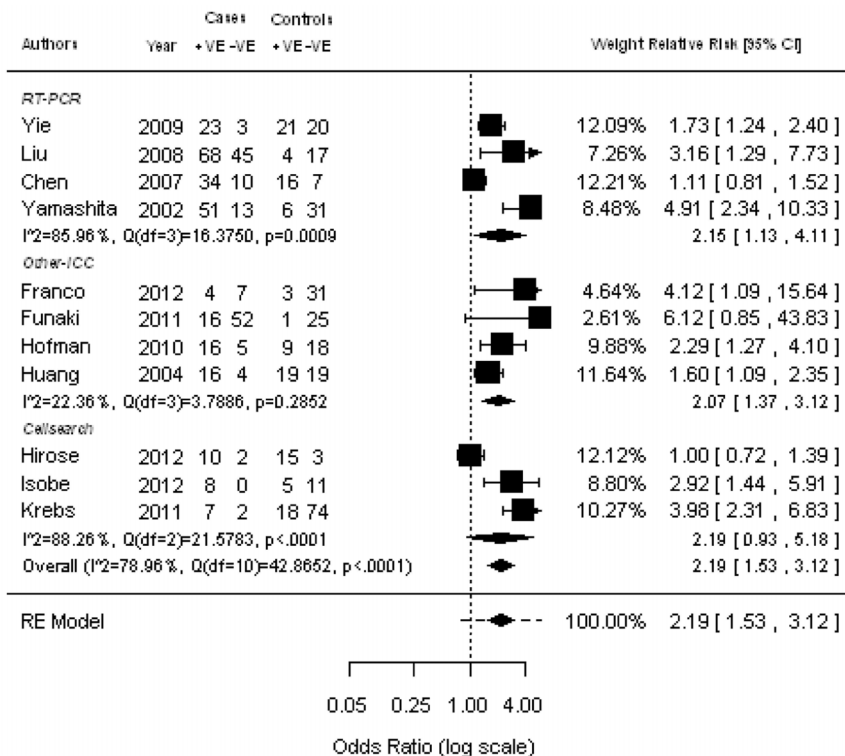

**Figure 5. Meta-analysis of relative risk (RR) for the association of the presence of CTCs with overall survival (OS).** It showed that patients with CTCs have a poorer survival compared to those without CTCs.  
doi:10.1371/journal.pone.0078070.g005

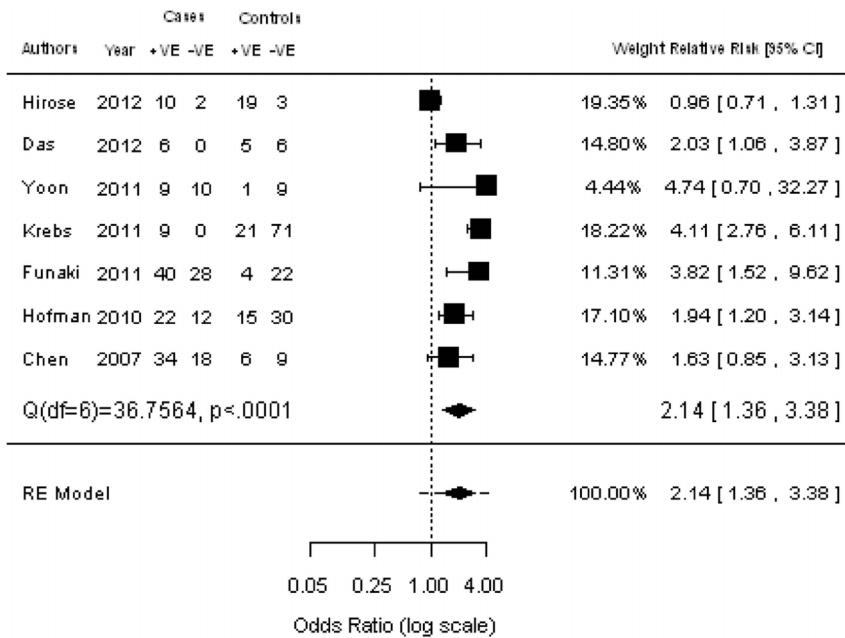

**Figure 6. Meta-analysis of RR for the association of the presence of CTCs with progression-free survival (PFS) /disease-free survival (DFS).**  
doi:10.1371/journal.pone.0078070.g006

used ICC techniques. These studies using epithelial cell antigen were varied, including CEA, CK, ERCC1 and other antigen. Four studies used CellSearch method, the cutoff of CTCs were set at  $\geq 1$  or  $\geq 2$  per 7.5 ml blood.

**Correlation of CTCs with clinicopathological parameters**

Ten studies were available for investigating the relationship between CTC status and histology (adenocarcinoma vs squamous cell carcinoma) (Figure 2). The estimated pooled OR was 0.88 (95% CI: 0.59–1.33;  $Z = -0.61$ ;  $P = 0.545$  fixed-effect), demonstrating that the presence of CTCs was not associated with histology. The heterogeneity and publication bias among studies was not significantly different (Table S1). Five studies assessed the relationship between CTC status and lymph node metastasis (Figure 3). We found that the presence of CTCs was associated with a significantly increased risk of lymph node metastasis in NSCLC patients (pooled OR = 1.95; 95% CI: 1.08–3.54;  $Z = 2.20$ ;  $P = 0.027$  fixed-effect). There was also a significant association between CTC status and tumor stage (pooled OR = 2.15; 95% CI: 1.19–3.74;  $Z = 2.53$ ;  $P = 0.011$  random-effect) (Figure 4), showing that the presence of CTCs was associated with a significantly increased risk of progression. Moreover, no significant heterogeneity or publication bias was indicated by Egger’s test.

**Effect of the presence of CTCs on OS in NSCLC**

Survival analysis according to CTC status was performed in 13 of 20 studies (65%), accounting for 1072 patients. OS was analyzed in 11 (936 patients) studies. Because the heterogeneity across the studies was less than 0.05 ( $Q = 54$ ,  $P < 0.0001$ ), the estimated pooled RR for studies was calculated using a random-effect model. The pooled RR showed that the presence of CTCs was highly correlated with poor OS (RR = 2.19; 95% CI: 1.53–3.12;  $Z = 4.32$ ;  $P < 0.0001$ ) (Figure 5). Moreover, using various detecting techniques sub-group analyses showed similar results. Meta-regression was performed to explore potential sources of

heterogeneity using the following covariates: publication year, sample size, tumor stage, and detection method. Univariate analysis did not identify any covariate significantly associated with RR estimates for OS ( $P < 0.05$ ) (Table S2). No significant publication bias was detected by Egger’s test.

With regard to PFS/DFS, seven studies were available that comprised 634 patients. The pooled RR showed that the presence of CTCs was associated with a significantly increased risk of mortality (RR = 2.14; 95% CI: 1.36–3.38;  $Z = 3.28$ ;  $P < 0.0001$  random-effect) (Figure 6). Egger’s test did not identify significant heterogeneity or publication bias.

**Discussion**

In this meta-analysis, we provided evidence of an association between the presence of CTCs detected in the blood and clinical outcomes in NSCLC patients. Previous several small-scale studies showed that clinical outcomes showed a poorer survival in patients when CTCs were detected. Therefore, a quantitative meta-analysis of the study outcomes was required. The results of our collective evaluation of the literature on NSCLC indicate that the presence of CTCs could be a prognostic marker.

NSCLC, as opposed to SCLC, is a heterogeneous family with respect to histology and biological characteristics [31]. Different patients with NSCLC and different cells within a tumor express different amounts of marker gene transcripts. In the current study, we showed that the use of different approaches, such as RT-PCR, ICC, and CellSearch, confirmed that CTCs represent a significant meta-risk for both OS and PFS in NSCLC, even after adjustment for publication bias. This is consistent with prior reports of meta-analysis in breast cancer, suggesting that this marker can be developed for clinical applications.

Regarding the number detected, previous studies reported that 30% of NSCLC was  $\geq 1$  CTCs per 7.5 ml blood detected by CellSearch, that 15% was  $\geq 5$  CTCs, and the CTC count increased significantly with distant metastasis than in patients

without [32,33]. Krebs et al. showed that the number and change in the number of CTCs is a prognostic factor in patients with stage  $\geq$ IIIA [25]. Among patients with NSCLC, those with  $\geq$ 5 CTCs were significantly worse prognosis compared with patients with  $<$ 5 CTCs. However, few trials had evaluated by subclassification of enumerating CTCs in patients with NSCLC. Further studies are needed to assess prognostic relevant CTC cut-off levels.

There are limitations to this meta-analysis. First, some data used unadjusted estimates, because not all published papers presented adjusted estimates, resulting in less reliable analysis than direct analysis of variance. However, the conclusions were unlikely to be significantly changed if those studies were adjusted. Second, CTC detection assays varied in our study. In particular, different end points, measurements, and experimental design, may have partly influenced the significance of clinicopathological outcome in survival analyses. Ideally, measurements should be conducted through large prospective studies based on homogeneous published statistics.

In conclusion, available evidence supports that CTCs are associated with tumor stage and lymph node metastasis, but not with histology. Moreover, the presence of CTCs is associated with

a poorer outcome than a lack of CTCs, and CTCs are strongly associated with reduced survival. Therapy decisions might be based on CTC results, which could be useful for determining which patients would potentially benefit from adjuvant therapy. These require validation in larger prospectively clinical cohorts.

## Supporting Information

**Table S1 Egger's test of funnel plot asymmetry.**  
(DOC)

**Table S2 Results of meta-regression analysis exploring source of heterogeneity with overall survival.**  
(DOC)

**Checklist S1 PRISMA checklist.**  
(DOC)

## Author Contributions

Conceived and designed the experiments: TZ Jian Huang. Analyzed the data: Jianwei Huang JX. Wrote the paper: Jianwei Huang KW.

## References

- Alberg AJ, Ford JG, Samet JM (2007) Epidemiology of lung cancer: ACCP evidence-based clinical practice guidelines (2nd edition). *Chest* 132: 29S–55S.
- Hofman V, Bonnetaud C, Ilie MI, Vielh P, Vignaud JM, et al. (2011) Preoperative circulating tumor cell detection using the isolation by size of epithelial tumor cell method for patients with lung cancer is a new prognostic biomarker. *Clin Cancer Res* 17: 827–835.
- Ashworth TA (1869) A case of cancer in which cells similar to those in the tumors were seen in the blood after death. *Aust Med J* 14:146–149.
- Fetsch PA, Cowan KH, Weng DE, Freifield A, Filie AC, et al. (2000) Detection of circulating tumor cells and micrometastases in stage II, III, and IV breast cancer patients utilizing cytology and immunocytochemistry. *Diagn Cytopathol* 22: 323–328.
- Smith B, Selby P, Southgate J, Pitman K, Bradley C, et al. (1991) Detection of melanoma cells in peripheral blood by means of reverse transcriptase and polymerase chain reaction. *Lancet* 338: 1227–1229.
- Okumura Y, Tanaka F, Yoneda K, Hashimoto M, Takuwa T, et al. (2009) Circulating tumor cells in pulmonary venous blood of primary lung cancer patients. *Ann Thorac Surg* 87: 1669–1675.
- Wu C, Hao H, Li L, Zhou X, Guo Z, et al. (2009) Preliminary investigation of the clinical significance of detecting circulating tumor cells enriched from lung cancer patients. *J Thorac Oncol* 4: 30–36.
- Nagrath S, Sequist LV, Maheswaran S, Bell DW, Irimia D, et al. (2007) Isolation of rare circulating tumour cells in cancer patients by microchip technology. *Nature* 450: 1235–1239.
- Zhang L, Riethdorf S, Wu G, Wang T, Yang K, et al. (2012) Meta-analysis of the prognostic value of circulating tumor cells in breast cancer. *Clin Cancer Res* 18: 5701–5710.
- Rahbari NN, Aigner M, Thorlund K, Mollberg N, Motschall E, et al. (2010) Meta-analysis shows that detection of circulating tumor cells indicates poor prognosis in patients with colorectal cancer. *Gastroenterology* 138: 1714–1726.
- Yamashita J, Matsuo A, Kurusu Y, Saishoji T, Hayashi N, et al. (2002) Preoperative evidence of circulating tumor cells by means of reverse transcriptase-polymerase chain reaction for carcinoembryonic antigen messenger RNA is an independent predictor of survival in non-small cell lung cancer: a prospective study. *J Thorac Cardiovasc Surg* 124: 299–305.
- Yoon SO, Kim YT, Jung KC, Jeon YK, Kim BH, et al. (2011) TTF-1 mRNA-positive circulating tumor cells in the peripheral blood predict poor prognosis in surgically resected non-small cell lung cancer patients. *Lung Cancer* 71: 209–216.
- Hirose T, Murata Y, Oki Y, Sugiyama T, Kusumoto S, et al. (2012) Relationship of circulating tumor cells to the effectiveness of cytotoxic chemotherapy in patients with metastatic non-small-cell lung cancer. *Oncol Res* 20: 131–137.
- Parmar MK, Torri V, Stewart L (1998) Extracting summary statistics to perform meta-analyses of the published literature for survival endpoints. *Stat Med* 17: 2815–2834.
- Siemel W, Seen-Hibler R, Mutschler W, Pantel K, Passlick B (2003) Tumour cells in the tumour draining vein of patients with non-small cell lung cancer: detection rate and clinical significance. *Eur J Cardiothorac Surg* 23: 451–456.
- Huang JS, Dong QG, Bao GL, Han BH (2004) [Implication of micrometastatic cancer cells in the peripheral blood on prognosis of non-small cell lung cancer]. *Zhonghua Zhong Liu Za Zhi* 26: 294–296.
- Sher YP, Shih JY, Yang PC, Roffler SR, Chu YW, et al. (2005) Prognosis of non-small cell lung cancer patients by detecting circulating cancer cells in the peripheral blood with multiple marker genes. *Clin Cancer Res* 11: 173–179.
- Rolle A, Gunzel R, Pachmann U, Willen B, Hoffken K, et al. (2005) Increase in number of circulating disseminated epithelial cells after surgery for non-small cell lung cancer monitored by MAINTRAC(R) is a predictor for relapse: A preliminary report. *World J Surg Oncol* 3: 18.
- Sheu CC, Yu YP, Tsai JR, Chang MY, Lin SR, et al. (2006) Development of a membrane array-based multimarker assay for detection of circulating cancer cells in patients with non-small cell lung cancer. *Int J Cancer* 119: 1419–1426.
- Chen TF, Jiang GL, Fu XL, Wang LJ, Qian H, et al. (2007) CK19 mRNA expression measured by reverse-transcription polymerase chain reaction (RT-PCR) in the peripheral blood of patients with non-small cell lung cancer treated by chemo-radiation: an independent prognostic factor. *Lung Cancer* 56: 105–114.
- Liu L, Liao GQ, He P, Zhu H, Liu PH, et al. (2008) Detection of circulating cancer cells in lung cancer patients with a panel of marker genes. *Biochem Biophys Res Commun* 372: 756–760.
- Tanaka F, Yoneda K, Kondo N, Hashimoto M, Takuwa T, et al. (2009) Circulating tumor cell as a diagnostic marker in primary lung cancer. *Clin Cancer Res* 15: 6980–6986.
- Yie SM, Lou B, Ye SR, He X, Cao M, et al. (2009) Clinical significance of detecting survivin-expressing circulating cancer cells in patients with non-small cell lung cancer. *Lung Cancer* 63: 284–290.
- Funaki S, Sawabata N, Nakagiri T, Shintani Y, Inoue M, et al. (2011) Novel approach for detection of isolated tumor cells in pulmonary vein using negative selection method: morphological classification and clinical implications. *Eur J Cardiothorac Surg* 40: 322–327.
- Krebs MG, Sloane R, Priest L, Lancashire L, Hou JM, et al. (2011) Evaluation and prognostic significance of circulating tumor cells in patients with non-small-cell lung cancer. *J Clin Oncol* 29: 1556–1563.
- Das M, Riess JW, Frankel P, Schwartz E, Bennis R, et al. (2012) ERCC1 expression in circulating tumor cells (CTCs) using a novel detection platform correlates with progression-free survival (PFS) in patients with metastatic non-small-cell lung cancer (NSCLC) receiving platinum chemotherapy. *Lung Cancer* 77: 421–426.
- Punnoose EA, Atwal S, Liu W, Raja R, Fine BM, et al. (2012) Evaluation of circulating tumor cells and circulating tumor DNA in non-small cell lung cancer: association with clinical endpoints in a phase II clinical trial of pertuzumab and erlotinib. *Clin Cancer Res* 18: 2391–2401.
- Isobe K, Hata Y, Kobayashi K, Hirota N, Sato K, et al. (2012) Clinical significance of circulating tumor cells and free DNA in non-small cell lung cancer. *Anticancer Res* 32: 3339–3344.
- Franco R, Pirozzi G, Scala S, Cantile M, Scognamiglio G, et al. (2012) CXCL12-binding receptors expression in non-small cell lung cancer relates to tumoral microvascular density and CXCR4 positive circulating tumoral cells in lung draining venous blood. *Eur J Cardiothorac Surg* 41: 368–375.
- Nieva J, Wendel M, Lutgen MS, Marinucci D, Bazhenova L, et al. (2012) High-definition imaging of circulating tumor cells and associated cellular events in non-small cell lung cancer patients: a longitudinal analysis. *Phys Biol* 9: 016004.

31. Hirsch FR, Spreafico A, Novello S, Wood MD, Simms L, et al. (2008) The prognostic and predictive role of histology in advanced non-small cell lung cancer: a literature review. *J Thorac Oncol* 3: 1468–1481.
32. Allard WJ, Matera J, Miller MC, Repollet M, Connelly MC, et al. (2004) Tumor cells circulate in the peripheral blood of all major carcinomas but not in healthy subjects or patients with nonmalignant diseases. *Clin Cancer Res* 10: 6897–6904.
33. Cristofanilli M, Budd GT, Ellis MJ, Stopeck A, Matera J, et al. (2004) Circulating tumor cells, disease progression, and survival in metastatic breast cancer. *N Engl J Med* 351: 781–791.
